# Supplementary material for: Polarized Raman spectroscopy study of CVD-grown Cr2S3 flakes: unambiguous identification of phonon modes
Source: Royal Society of Chemistry journal article supplement (doi:10.1039/d4nr01654h), 2024-01-01
Supplement: d4nr01654h8.pdf [file d4nr01654h8.pdf]

## Supplementary Information

### Polarized Raman spectroscopy study of CVD-grown Cr<sub>2</sub>S<sub>3</sub> flakes: Unambiguous identification of phonon modes

Anabil Gayen<sup>1,2</sup>, Gwang Hwi An<sup>1</sup>, Ikhwan Nur Rahman<sup>1</sup>, Min Choi<sup>1</sup>, Qoimatul Mustaghfiroh<sup>1</sup>, Prashant Vijay Gaikwad<sup>1,2</sup>, Evan S. H. Kang<sup>1</sup>, Kyoung-Ho Kim<sup>1,2</sup>, Chuyang Liu<sup>3</sup>, Kyung Wan Kim<sup>1,2\*</sup>, Junhyeok Bang<sup>1,2\*\*</sup>, Hyun Seok Lee<sup>1,2\*\*\*</sup> and Dong-Hyun Kim<sup>1,2\*\*\*\*</sup>

<sup>1</sup>*Department of Physics, Chungbuk National University, Cheongju 28644, Korea*

<sup>2</sup>*Research Institute for Nanoscale Science and Technology, Chungbuk National University, Cheongju 28644, Korea*

<sup>3</sup>*School of Materials Science and Technology, Nanjing University of Aeronautics and Astronautics, Nanjing, 211106, China*

*Corresponding authors' emails: \* kyungwan@chungbuk.ac.kr, \*\*jbang@cbnu.ac.kr, \*\*\*hsl@chungbuk.ac.kr, \*\*\*\*donghyun@cbnu.ac.kr*

#### Section 1: Schematic Diagram of CVD process:

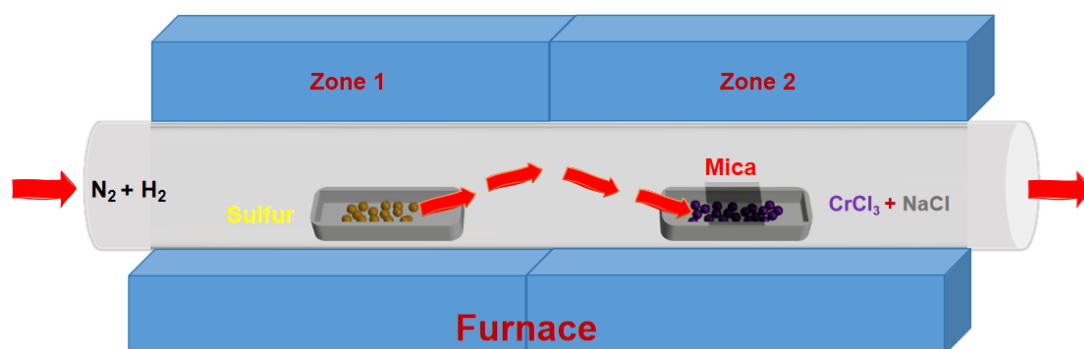

**Figure S1.** Schematic diagram of the set-up used for CVD growth of 2D Cr<sub>2</sub>S<sub>3</sub> nanoflakes.

## Section 2: Examination of the quality and uniformity of the CVD-grown $\text{Cr}_2\text{S}_3$ nanoflakes:

(a)

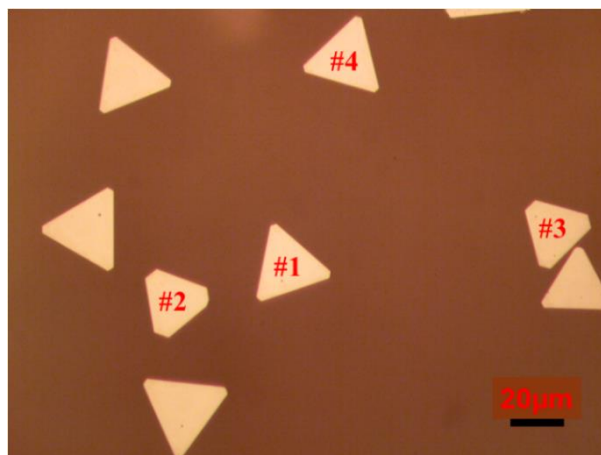

(b)

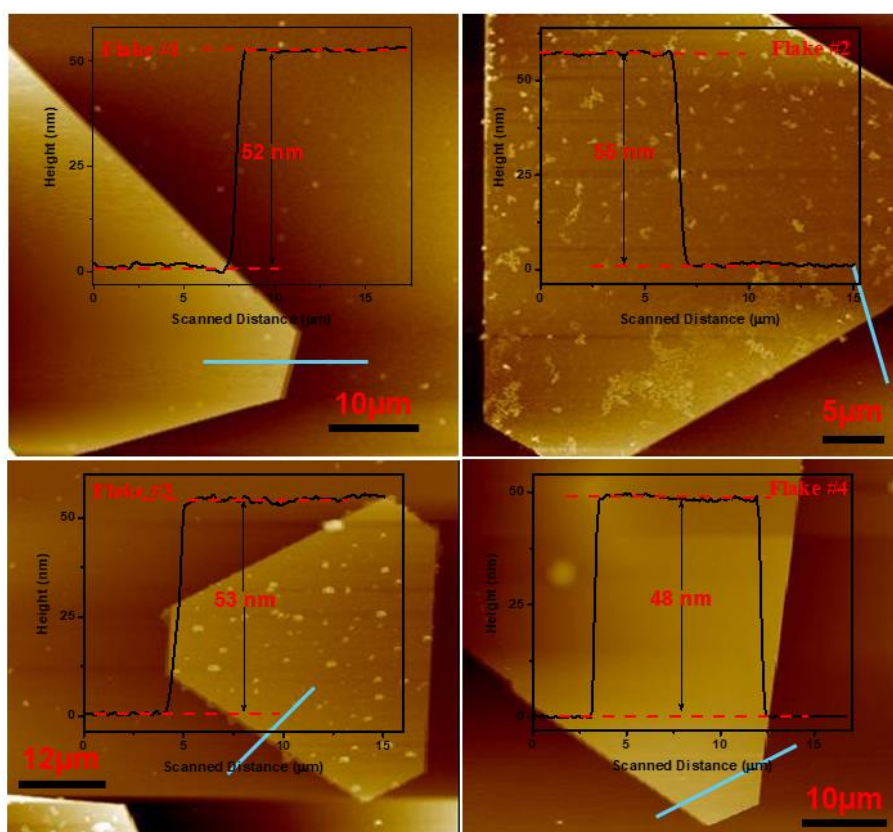

**Figure S2.** (a) Optical microscope image of CVD-grown 2D  $\text{Cr}_2\text{S}_3$  on mica substrate, where four different flakes are numbered; (b) AFM images of those four numbered flakes together with their respective height profiles.

**Section 3: AFM images and corresponding height profiles of CVD-grown 2D Cr<sub>2</sub>S<sub>3</sub> nanoflakes having different thicknesses:**

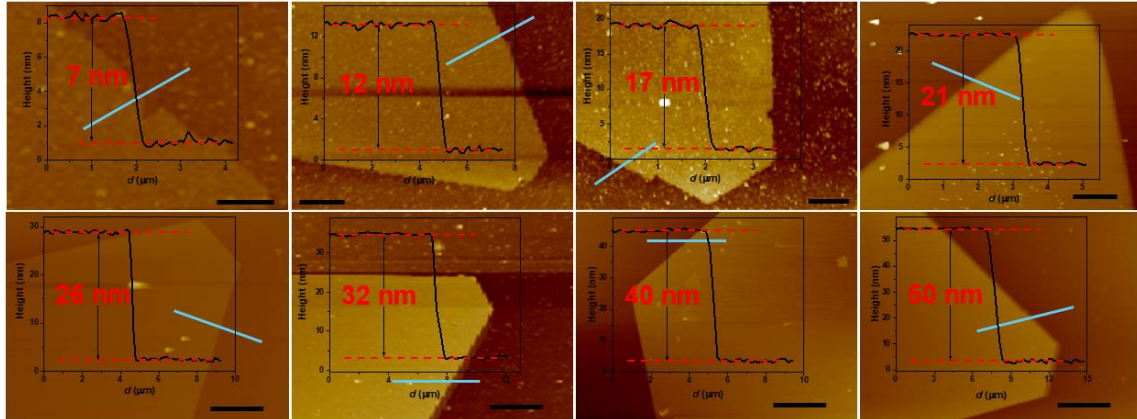

**Figure S3.** AFM images and corresponding height profiles of CVD-grown 2D Cr<sub>2</sub>S<sub>3</sub> nanoflakes having different thicknesses used for thickness dependent Raman study in Fig. 2(b) of main text. The scale bar for the four images in the first row is 2 μm and that is for the second row is 8 μm.

**Section 4: Deconvolution of closely placed Raman modes,  $P_1$  and  $P_2$ , over the wide temperature regime:**

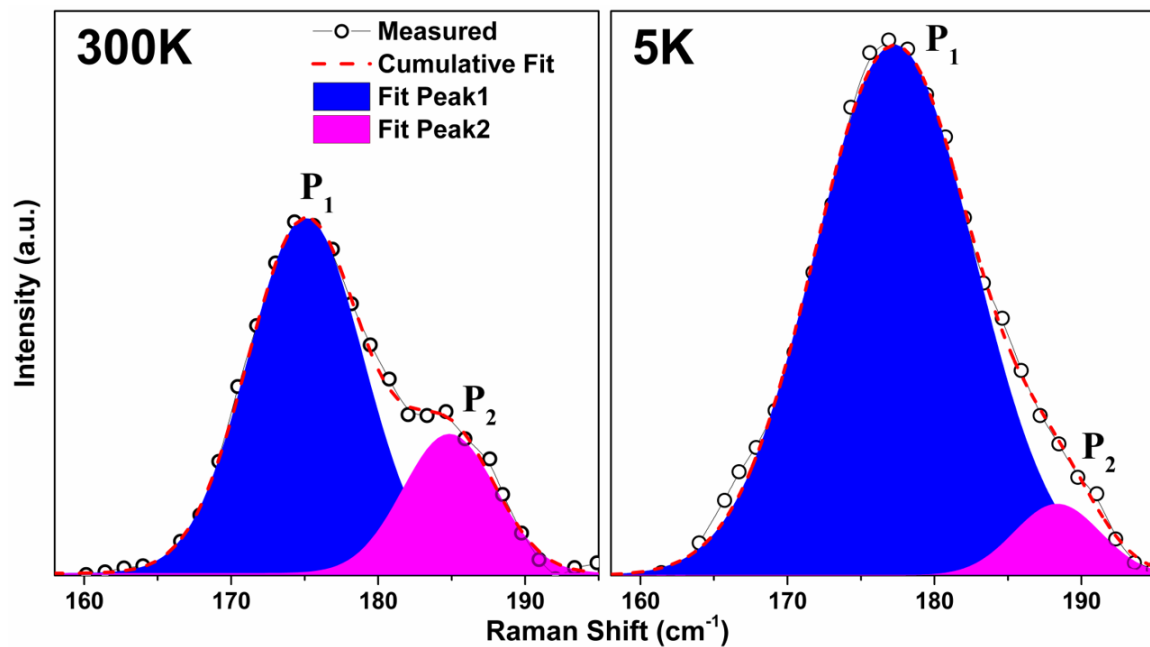

**Figure S4.** Deconvolution of two closely placed modes,  $P_1$  and  $P_2$ , at temperatures 300K and 5K.

**Section 5: Schematic diagrams of different polarized Raman spectroscopy setup:**

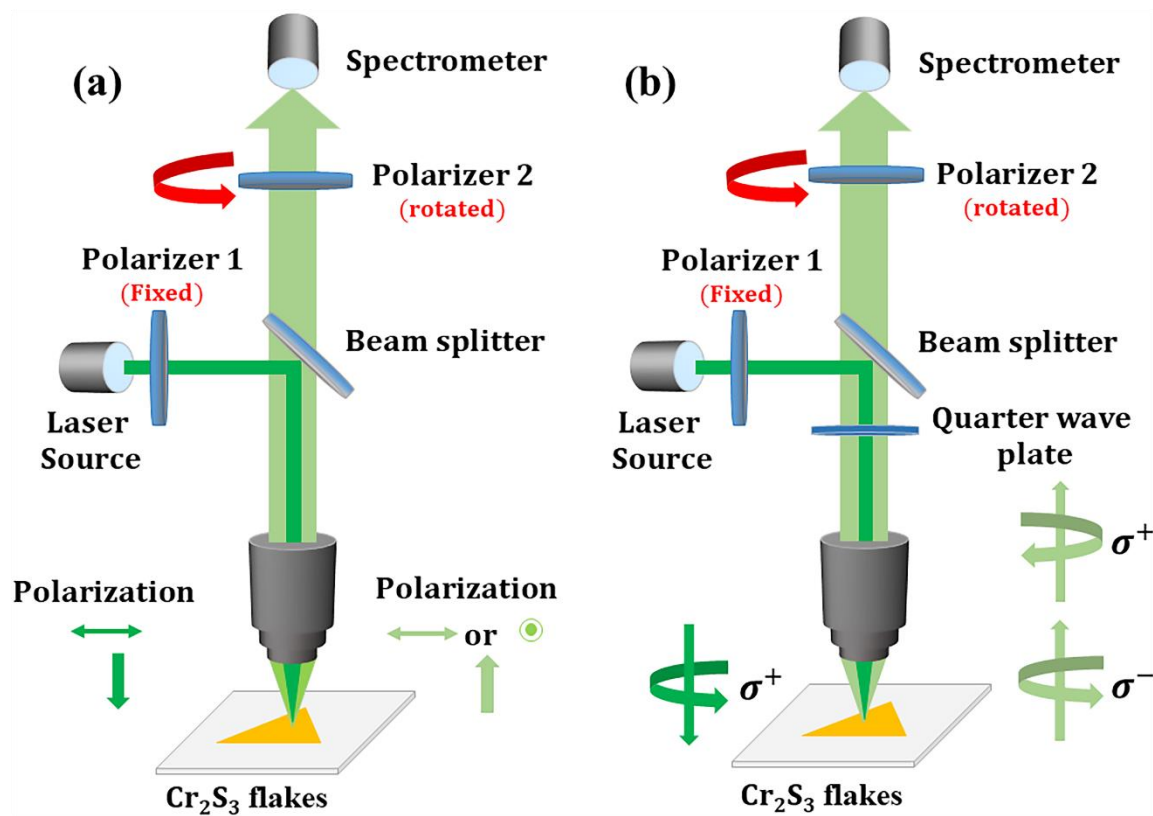

**Figure S5.** Schematic diagram of the experimental setup for, (a) linearly polarized Raman spectroscopy; (b) circularly polarized Raman spectroscopy.

**Section 6: Raman spectroscopy results, for linearly polarized light, at different temperatures; Schematic of ARPRS setup:**

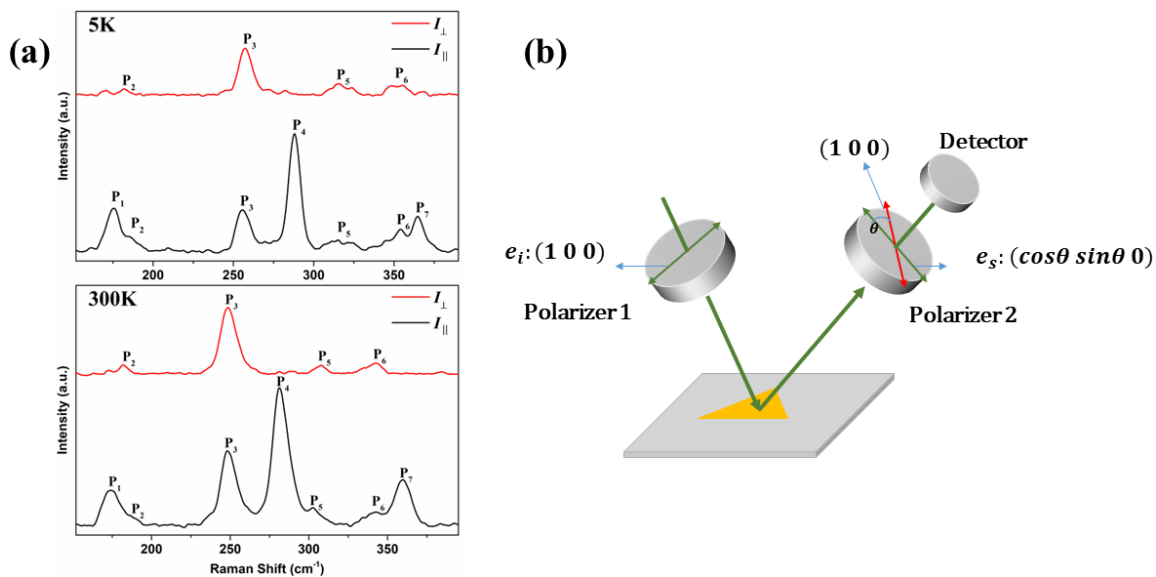

**Figure S6. (a)** Linearly polarized Raman spectroscopy for parallel ( $\parallel$ ) and perpendicular ( $\perp$ ) configurations measured at 5K and 300K; **(b)** Schematic diagram of the experimental setup for Angle resolved polarized Raman spectroscopy.

**Section 7: Table containing the first-order temperature coefficient ( $\chi$ ) values of various 2D materials:**

**Table S1: Comparison of the first-order temperature coefficient ( $\chi$ ) value for various 2D materials including this work:**

| Materials                                             | Raman modes                               | $\chi$ (cm <sup>-1</sup> K <sup>-1</sup> ) | References |
|-------------------------------------------------------|-------------------------------------------|--------------------------------------------|------------|
| Monolayer graphene                                    | G                                         | -0.0162                                    | 1          |
| Bilayer graphene                                      | G                                         | -0.0154                                    |            |
| Monolayer MoS <sub>2</sub>                            | A <sub>1g</sub>                           | -0.013                                     | 2          |
|                                                       | E <sub>2g</sub>                           | -0.011                                     |            |
| Few-layer MoS <sub>2</sub>                            | A <sub>1g</sub>                           | -0.0123                                    | 3          |
|                                                       | E <sub>2g</sub>                           | -0.0132                                    |            |
| Few-layer black phosphorus                            | A <sub>1g</sub>                           | -0.023                                     | 4          |
|                                                       | A <sub>2g</sub>                           | -0.018                                     |            |
|                                                       | B <sub>2g</sub>                           | -0.023                                     |            |
| Few-layer WS <sub>2</sub>                             | A <sub>1g</sub>                           | -0.004                                     | 5          |
|                                                       | E <sub>2g</sub>                           | -0.008                                     |            |
| ZrSiS single crystals                                 | E <sub>g</sub> <sup>1</sup>               | -0.008                                     | 6          |
|                                                       | E <sub>g</sub> <sup>2</sup>               | -0.009                                     |            |
|                                                       | E <sub>g</sub> <sup>3</sup>               | -0.015                                     |            |
|                                                       | A <sub>1g</sub> <sup>1</sup>              | -0.012                                     |            |
|                                                       | A <sub>1g</sub> <sup>2</sup>              | -0.012                                     |            |
|                                                       | B <sub>1g</sub>                           | -0.014                                     |            |
| 2D SnTe nanosheets                                    | A <sub>1g</sub>                           | -0.0183                                    | 7          |
|                                                       | E <sub>2g</sub>                           | -0.0141                                    |            |
| 15 nm $\gamma$ -Ga <sub>2</sub> S <sub>3</sub> flakes | A <sub>1g</sub>                           | -0.0073                                    | 8          |
| CVD-grown Cr <sub>2</sub> S <sub>3</sub>              | E <sub>g</sub> (~247.4 cm <sup>-1</sup> ) | -0.0103                                    | 9          |
|                                                       | A <sub>g</sub> (~281 cm <sup>-1</sup> )   | -0.0066                                    |            |
|                                                       | A <sub>g</sub> (~355.5 cm <sup>-1</sup> ) | -0.0105                                    |            |
| 50 nm thick Cr <sub>2</sub> S <sub>3</sub>            | A <sub>g</sub> (~175.1 cm <sup>-1</sup> ) | -0.0093                                    | This work  |
|                                                       | E <sub>g</sub> (~184.8 cm <sup>-1</sup> ) | -0.0099                                    |            |
|                                                       | E <sub>g</sub> (~250.1 cm <sup>-1</sup> ) | -0.0235                                    |            |
|                                                       | A <sub>g</sub> (~283.1 cm <sup>-1</sup> ) | -0.0174                                    |            |
|                                                       | A <sub>g</sub> (~360.2 cm <sup>-1</sup> ) | -0.0210                                    |            |

## Section 8: Calculation details of Optical Selection Rule based on crystal symmetry dependent Raman Tensor:

### Part 1:

The intensity of a Raman active mode with Raman tensor,  $R_j$  can be deduced by,

$$I \propto \sum_j |e_s^\dagger \cdot R_j \cdot e_i|^2$$

Where  $e_i$  and  $e_s$  are polarization vectors of the incident and scattered light.

The corresponding Raman tensors for Rhombohedral  $\text{Cr}_2\text{S}_3$  belonging to  $R\bar{3}$  space group (No. 148) are as follows:

$$A_g = \begin{pmatrix} a & 0 & 0 \\ 0 & a & 0 \\ 0 & 0 & b \end{pmatrix}; E_g = \begin{pmatrix} c & d & e \\ d & -c & f \\ e & f & 0 \end{pmatrix}, \begin{pmatrix} d & -c & -f \\ -c & -d & e \\ -f & e & 0 \end{pmatrix}$$

For linearly parallel polarization configuration ( $\parallel$ ), the incident and scattered polarization vectors are:

$$e_i = \begin{pmatrix} 1 \\ 0 \\ 0 \end{pmatrix}; e_s = \begin{pmatrix} 1 \\ 0 \\ 0 \end{pmatrix}$$

The corresponding Raman intensities of Raman active modes are:



$$I_{\parallel}(\mathbf{A}_g) \propto \left| (1 \ 0 \ 0) \begin{pmatrix} a & 0 & 0 \\ 0 & a & 0 \\ 0 & 0 & b \end{pmatrix} \begin{pmatrix} 1 \\ 0 \\ 0 \end{pmatrix} \right|^2 = \left| (1 \ 0 \ 0) \begin{pmatrix} a \\ 0 \\ 0 \end{pmatrix} \right|^2 \\ = |\mathbf{a}|^2$$

$$I_{\parallel}(\mathbf{E}_g) \propto \left| (1 \ 0 \ 0) \begin{pmatrix} c & d & e \\ d & -c & f \\ e & f & 0 \end{pmatrix} \begin{pmatrix} 1 \\ 0 \\ 0 \end{pmatrix} \right|^2 + \\ \left| (1 \ 0 \ 0) \begin{pmatrix} d & -c & -f \\ -c & -d & e \\ -f & e & 0 \end{pmatrix} \begin{pmatrix} 1 \\ 0 \\ 0 \end{pmatrix} \right|^2 \\ = \left| (1 \ 0 \ 0) \begin{pmatrix} c \\ d \\ e \end{pmatrix} \right|^2 + \left| (1 \ 0 \ 0) \begin{pmatrix} d \\ -c \\ -f \end{pmatrix} \right|^2 = |\mathbf{c}|^2 + |\mathbf{d}|^2$$

For linearly perpendicular polarization configuration ( $\perp$ ), the polarization vectors for the incident and scattered light vectors are:

$$e_i = \begin{pmatrix} 1 \\ 0 \\ 0 \end{pmatrix}; \quad e_s = \begin{pmatrix} 0 \\ 1 \\ 0 \end{pmatrix}$$

The corresponding Raman intensities of Raman active modes for linearly perpendicular polarization configuration are:

$$I_{\perp}(\mathbf{A}_g) \propto \left| (0 \ 1 \ 0) \begin{pmatrix} a & 0 & 0 \\ 0 & a & 0 \\ 0 & 0 & b \end{pmatrix} \begin{pmatrix} 1 \\ 0 \\ 0 \end{pmatrix} \right|^2 = \left| (0 \ 1 \ 0) \begin{pmatrix} a \\ 0 \\ 0 \end{pmatrix} \right|^2 = \mathbf{0}$$

$$\begin{aligned}
I_{\perp}(\mathbf{E}_g) &\propto \left| (0 \ 1 \ 0) \begin{pmatrix} c & d & e \\ d & -c & f \\ e & f & 0 \end{pmatrix} \begin{pmatrix} 1 \\ 0 \\ 0 \end{pmatrix} \right|^2 + \\
&\left| (0 \ 1 \ 0) \begin{pmatrix} d & -c & -f \\ -c & -d & e \\ -f & e & 0 \end{pmatrix} \begin{pmatrix} 1 \\ 0 \\ 0 \end{pmatrix} \right|^2 \\
&= \left| (0 \ 1 \ 0) \begin{pmatrix} c \\ d \\ e \end{pmatrix} \right|^2 + \left| (0 \ 1 \ 0) \begin{pmatrix} d \\ -c \\ -f \end{pmatrix} \right|^2 = |c|^2 + |d|^2
\end{aligned}$$

## Part 2:

Calculations for Angle Resolved Polarized Raman spectra (ARPRS):

For Angle Resolved Polarized Raman spectra, the intensities for both  $\mathbf{A}_g$  and  $\mathbf{E}_g$  modes can be calculated using the same formula:

$$I \propto \sum_j |e_s^\dagger \cdot R_j \cdot e_i|^2$$

In this configuration the incident and scattered polarization vectors are:

$$e_i = \begin{pmatrix} 1 \\ 0 \\ 0 \end{pmatrix}; e_s = \begin{pmatrix} \cos\theta \\ \sin\theta \\ 0 \end{pmatrix} \quad ; \quad \begin{matrix} \theta : 0^\circ & 90^\circ \\ \parallel & \perp \end{matrix}$$

$$\begin{aligned}
I(\mathbf{A}_g) &\propto \left| (\cos\theta \quad \sin\theta \quad 0) \begin{pmatrix} a & 0 & 0 \\ 0 & a & 0 \\ 0 & 0 & b \end{pmatrix} \begin{pmatrix} 1 \\ 0 \\ 0 \end{pmatrix} \right|^2 = \\
&\left| (\cos\theta \quad \sin\theta \quad 0) \begin{pmatrix} a \\ 0 \\ 0 \end{pmatrix} \right|^2 = \mathbf{a^2 \cos^2 \theta}
\end{aligned}$$

$$\begin{aligned}
I(\mathbf{E}_g) &\propto \left| (\cos\theta \quad \sin\theta \quad 0) \begin{pmatrix} c & d & e \\ d & -c & f \\ e & f & 0 \end{pmatrix} \begin{pmatrix} 1 \\ 0 \\ 0 \end{pmatrix} \right|^2 + \\
&\left| (\cos\theta \quad \sin\theta \quad 0) \begin{pmatrix} d & -c & -f \\ -c & -d & e \\ -f & e & 0 \end{pmatrix} \begin{pmatrix} 1 \\ 0 \\ 0 \end{pmatrix} \right|^2 \\
&= \left| (\cos\theta \quad \sin\theta \quad 0) \begin{pmatrix} c \\ d \\ e \end{pmatrix} \right|^2 + \left| (\cos\theta \quad \sin\theta \quad 0) \begin{pmatrix} d \\ -c \\ -f \end{pmatrix} \right|^2 = \\
&|c\cos\theta + d\sin\theta|^2 + |d\cos\theta - c\sin\theta|^2 \\
&= \mathbf{c^2 + d^2}
\end{aligned}$$

### Part 3:

Calculations for Polarized Raman spectra with circularly polarized light:

The helicity selection rule can be determined by the Raman tensor ( $\mathbf{R}_j$ ), The calculated Raman intensity is determined by:

$$I \propto \sum_j |\sigma_s^\dagger \cdot R_j \cdot \sigma_i|^2$$

Where  $\sigma_s$  and  $\sigma_i$  are the incident and scattered circularly polarized vectors.

Polarization vectors for left ( $\sigma^+$ ) and right ( $\sigma^-$ ) circularly polarized light are:

$$\sigma^+ = \frac{1}{\sqrt{2}} \begin{pmatrix} 1 \\ i \\ 0 \end{pmatrix}; \sigma^- = \frac{1}{\sqrt{2}} \begin{pmatrix} 1 \\ -i \\ 0 \end{pmatrix}$$

Hence, the intensities for  $\mathbf{A}_g$  and  $\mathbf{E}_g$  modes for both helicity conserved ( $\sigma^+\sigma^+$ ) and helicity changed ( $\sigma^+\sigma^-$ ) cases can be calculated as:-

For helicity conserved case ( $\sigma^+\sigma^+$ ):

$$\begin{aligned} I_{\sigma^+\sigma^+}(\mathbf{A}_g) &\propto \\ \left| \frac{1}{2} (1 \quad -i \quad 0) \begin{pmatrix} a & 0 & 0 \\ 0 & a & 0 \\ 0 & 0 & b \end{pmatrix} \begin{pmatrix} 1 \\ i \\ 0 \end{pmatrix} \right|^2 &= \left| \frac{1}{2} (1 \quad -i \quad 0) \begin{pmatrix} a \\ ai \\ 0 \end{pmatrix} \right|^2 \\ &= \left| \frac{1}{2} (a + a + 0) \right|^2 = |a|^2 \end{aligned}$$

$$\begin{aligned}
I_{\sigma+\sigma+}(\mathbf{E}_g) &\propto \left| \frac{1}{2} (1 \quad -i \quad 0) \begin{pmatrix} c & d & e \\ d & -c & f \\ e & f & 0 \end{pmatrix} \begin{pmatrix} 1 \\ i \\ 0 \end{pmatrix} \right|^2 + \\
&\left| \frac{1}{2} (1 \quad -i \quad 0) \begin{pmatrix} d & -c & -f \\ -c & -d & e \\ -f & e & 0 \end{pmatrix} \begin{pmatrix} 1 \\ i \\ 0 \end{pmatrix} \right|^2 = \\
&\left| \frac{1}{2} (1 \quad -i \quad 0) \begin{pmatrix} c+id \\ d-ic \\ e+if \end{pmatrix} \right|^2 + \left| \frac{1}{2} (1 \quad -i \quad 0) \begin{pmatrix} d-ic \\ -c-id \\ -f+ie \end{pmatrix} \right|^2 = \\
&\left| \frac{1}{2} (c+id-id-c) \right|^2 + \left| \frac{1}{2} (d-ic+ic-d) \right|^2 = \mathbf{0}
\end{aligned}$$

For helicity changed case ( $\sigma+\sigma^-$ ):

$$\begin{aligned}
I_{\sigma+\sigma-}(\mathbf{A}_g) &\propto \\
&\left| \frac{1}{2} (1 \quad i \quad 0) \begin{pmatrix} a & 0 & 0 \\ 0 & a & 0 \\ 0 & 0 & b \end{pmatrix} \begin{pmatrix} 1 \\ i \\ 0 \end{pmatrix} \right|^2 = \left| \frac{1}{2} (1 \quad i \quad 0) \begin{pmatrix} a \\ ai \\ 0 \end{pmatrix} \right|^2 = \\
&\left| \frac{1}{2} (a-a+0) \right|^2 = \mathbf{0}
\end{aligned}$$

$$\begin{aligned}
I_{\sigma+\sigma-}(\mathbf{E}_g) &\propto \left| \frac{1}{2} (1 \quad i \quad 0) \begin{pmatrix} c & d & e \\ d & -c & f \\ e & f & 0 \end{pmatrix} \begin{pmatrix} 1 \\ i \\ 0 \end{pmatrix} \right|^2 + \\
&\left| \frac{1}{2} (1 \quad i \quad 0) \begin{pmatrix} d & -c & -f \\ -c & -d & e \\ -f & e & 0 \end{pmatrix} \begin{pmatrix} 1 \\ i \\ 0 \end{pmatrix} \right|^2 = \\
&\left| \frac{1}{2} (1 \quad i \quad 0) \begin{pmatrix} c+id \\ d-ic \\ e+if \end{pmatrix} \right|^2 + \left| \frac{1}{2} (1 \quad i \quad 0) \begin{pmatrix} d-ic \\ -c-id \\ -f+ie \end{pmatrix} \right|^2 = \\
&\left| \frac{1}{2} (c+id+c+id) \right|^2 + \left| \frac{1}{2} (d-ic-ic+d) \right|^2 = \mathbf{2(c^2 + d^2)}
\end{aligned}$$

## References

- [1] I. Calizo, A.A. Balandin, W. Bao, F. Miao, and C. N. Lau, *Temperature Dependence of the Raman Spectra of Graphene and Graphene Multilayers*, Nano Lett., 7, 2645 (2007).
- [2] R. Yan, J.R. Simpson, S. Bertolazzi, J. Brivio, M. Watson, X. Wu, A. Kis, T. Luo, A.R. Hight Walker, and H.G. Xing, *Thermal Conductivity of Molybdenum Disulfide Obtained from Temperature-Dependent Raman Spectroscopy*, ACS Nano 8, 986 (2014).
- [3] S. Sahoo, A.P.S. Gaur, M. Ahmadi, M.J.-F. Guinel, and R.S. Katiyar, *Temperature-Dependent Raman Studies and Thermal Conductivity of Few-Layer MoS<sub>2</sub>*, J. Phys. Chem. C 117, 9042 (2013).
- [4] S. Zhang, J. Yang, R. J. Xu, F. Wang, W. F. Li, M. Ghufuran, Y. W. Zhang, Z. F. Yu, G. Zhang, Q. H. Qin and Y. R. Lu, *Extraordinary Photoluminescence and Strong Temperature/Angle-Dependent Raman Responses in Few-Layer Phosphorene*, ACS Nano, 8, 9590 (2014).
- [5] M. Thripuranthaka, R.V. Kashid, C.S. Rout, D.J. Late, *Temperature dependent Raman spectroscopy of chemically derived few layer MoS<sub>2</sub> and WS<sub>2</sub> nanosheets*, Appl. Phys. Lett. 104, 081911 (2014).
- [6] W. Zhou, H. Gao, J. Zhang, R. Fang, H. Song, T. Hu, A. Stroppa, L. Li, X. Wang, S. Ruan, and W. Ren, *Lattice dynamics of Dirac node-line semimetal ZrSiS*, Phys. Rev. B 96, 064103 (2017).
- [7] Y. Su, C. Ding, Y. Yao, R. Fu, M. Xu, X. Liu, J. Lin, F. Wang, X. Zhan and Z. Wang, *Orietation-controlled synthesis and Raman study of 2D SnTe*, Nanotechnology 34, 505206 (2023).
- [8] N. Zhou, L. Gan, R. Yang, F. Wang, L. Li, Y. Chen, D. Li, and T. Zhai, *Nonlayered Two-Dimensional Defective Semiconductor  $\gamma$ -Ga<sub>2</sub>S<sub>3</sub> toward Broadband Photodetection*, ACS Nano 13, 6297 (2019).
- [9] S. Zhou, R. Wang, J. Han, D. Wang, H. Li, L. Gan, and Tianyou Zhai, *Ultrathin Non-van der Waals Magnetic Rhombohedral Cr<sub>2</sub>S<sub>3</sub>: Space-Confined Chemical Vapor Deposition Synthesis and Raman Scattering Investigation*, Adv. Funct. Mater. 29, 1805880 (2019).

\*\*\*\*\*
