# Supplementary figures and images for: Polarized Raman spectroscopy study of CVD-grown Cr2S3 flakes: unambiguous identification of phonon modes
Source: Royal Society of Chemistry journal article supplement (doi:10.1039/d4nr01654h), 2024-01-01

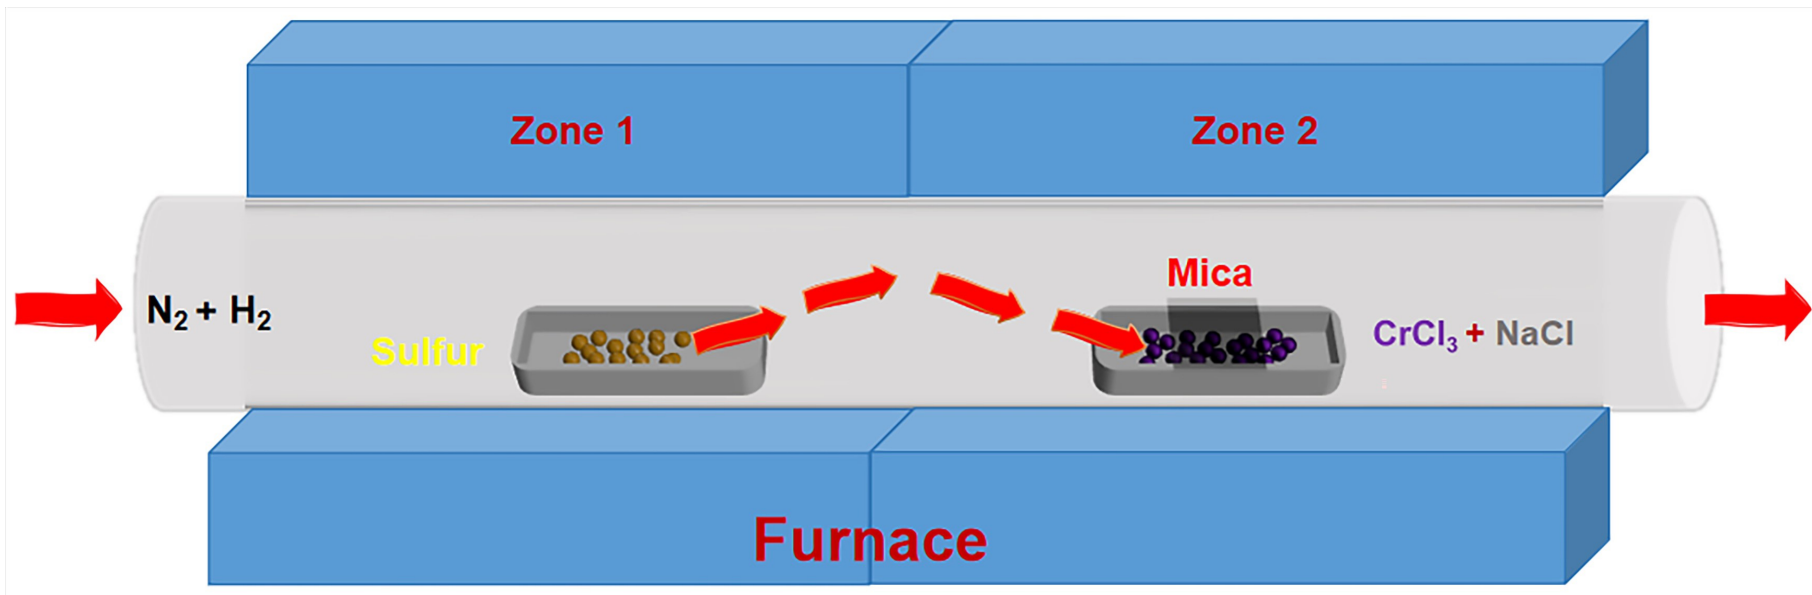

Supplement: d4nr01654h2.pdf [file d4nr01654h2.pdf]

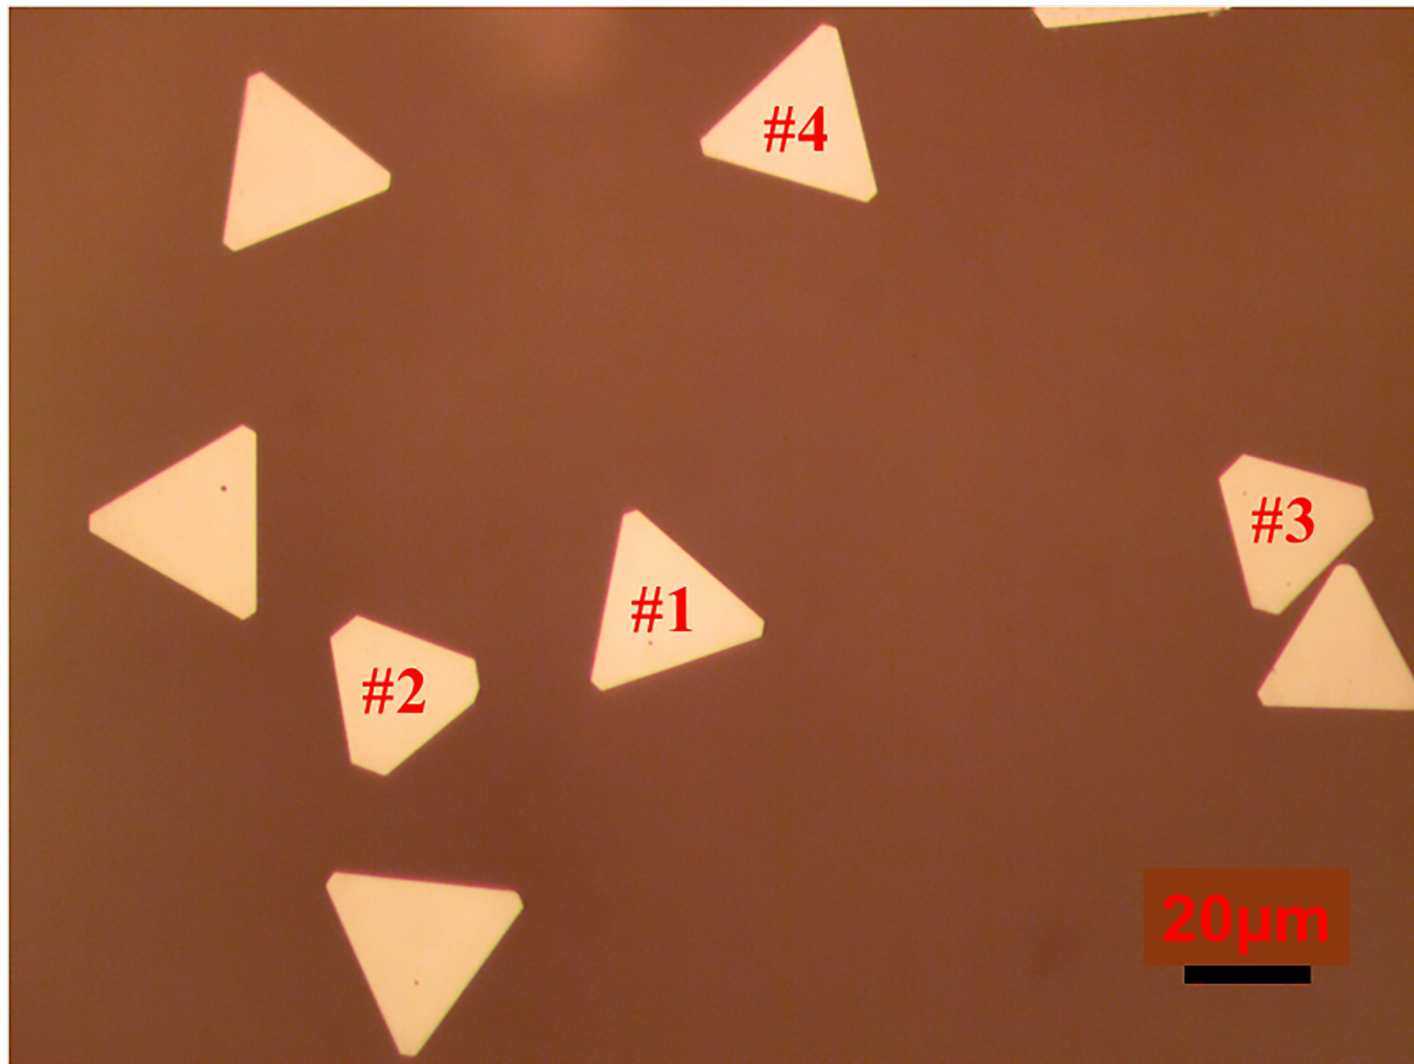

Supplement: d4nr01654h3.pdf [file d4nr01654h3.pdf]

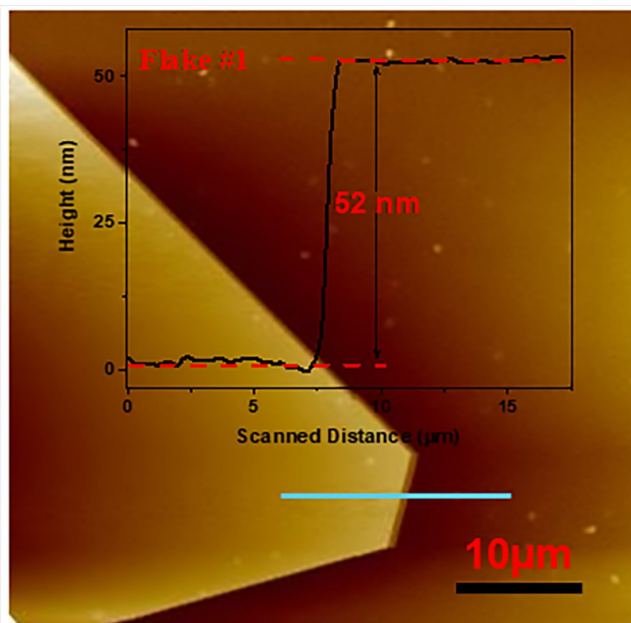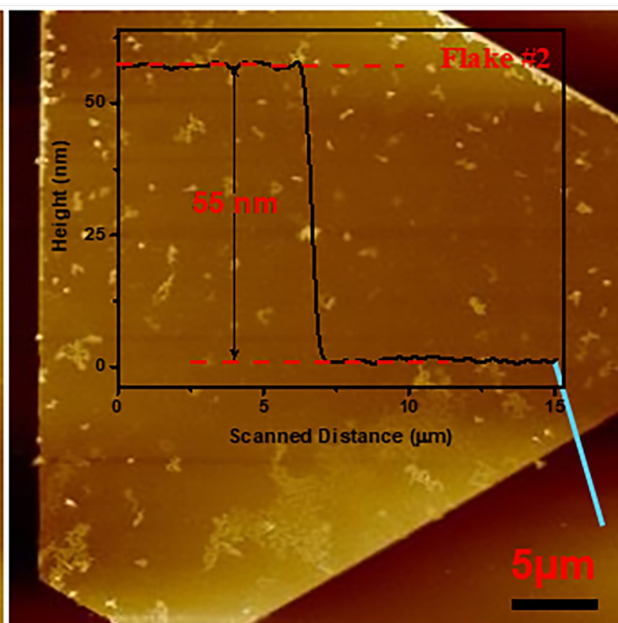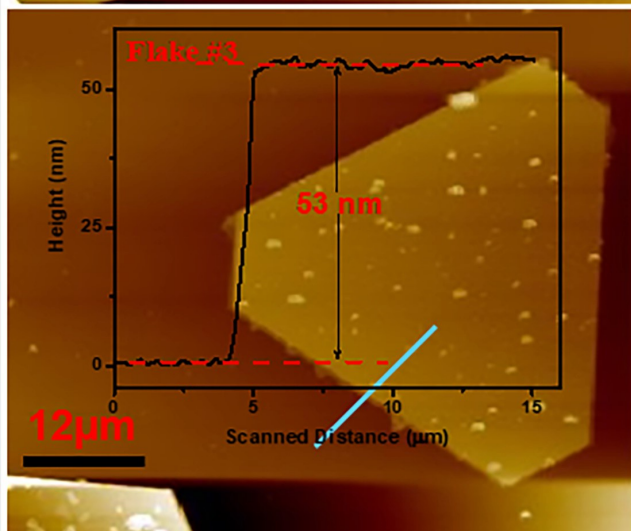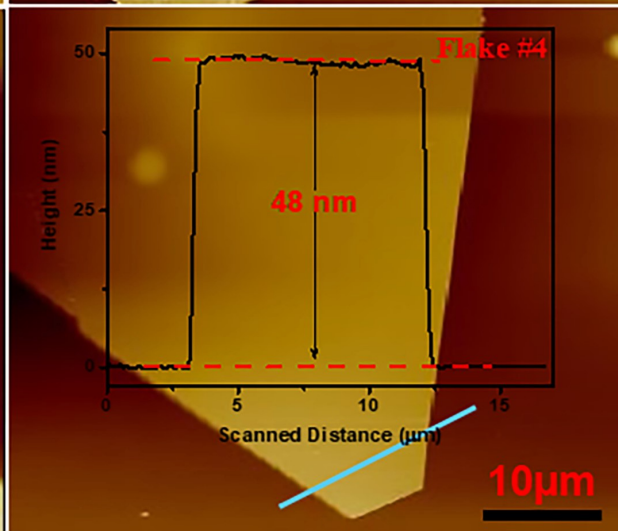

Supplement: d4nr01654h4.pdf [file d4nr01654h4.pdf]

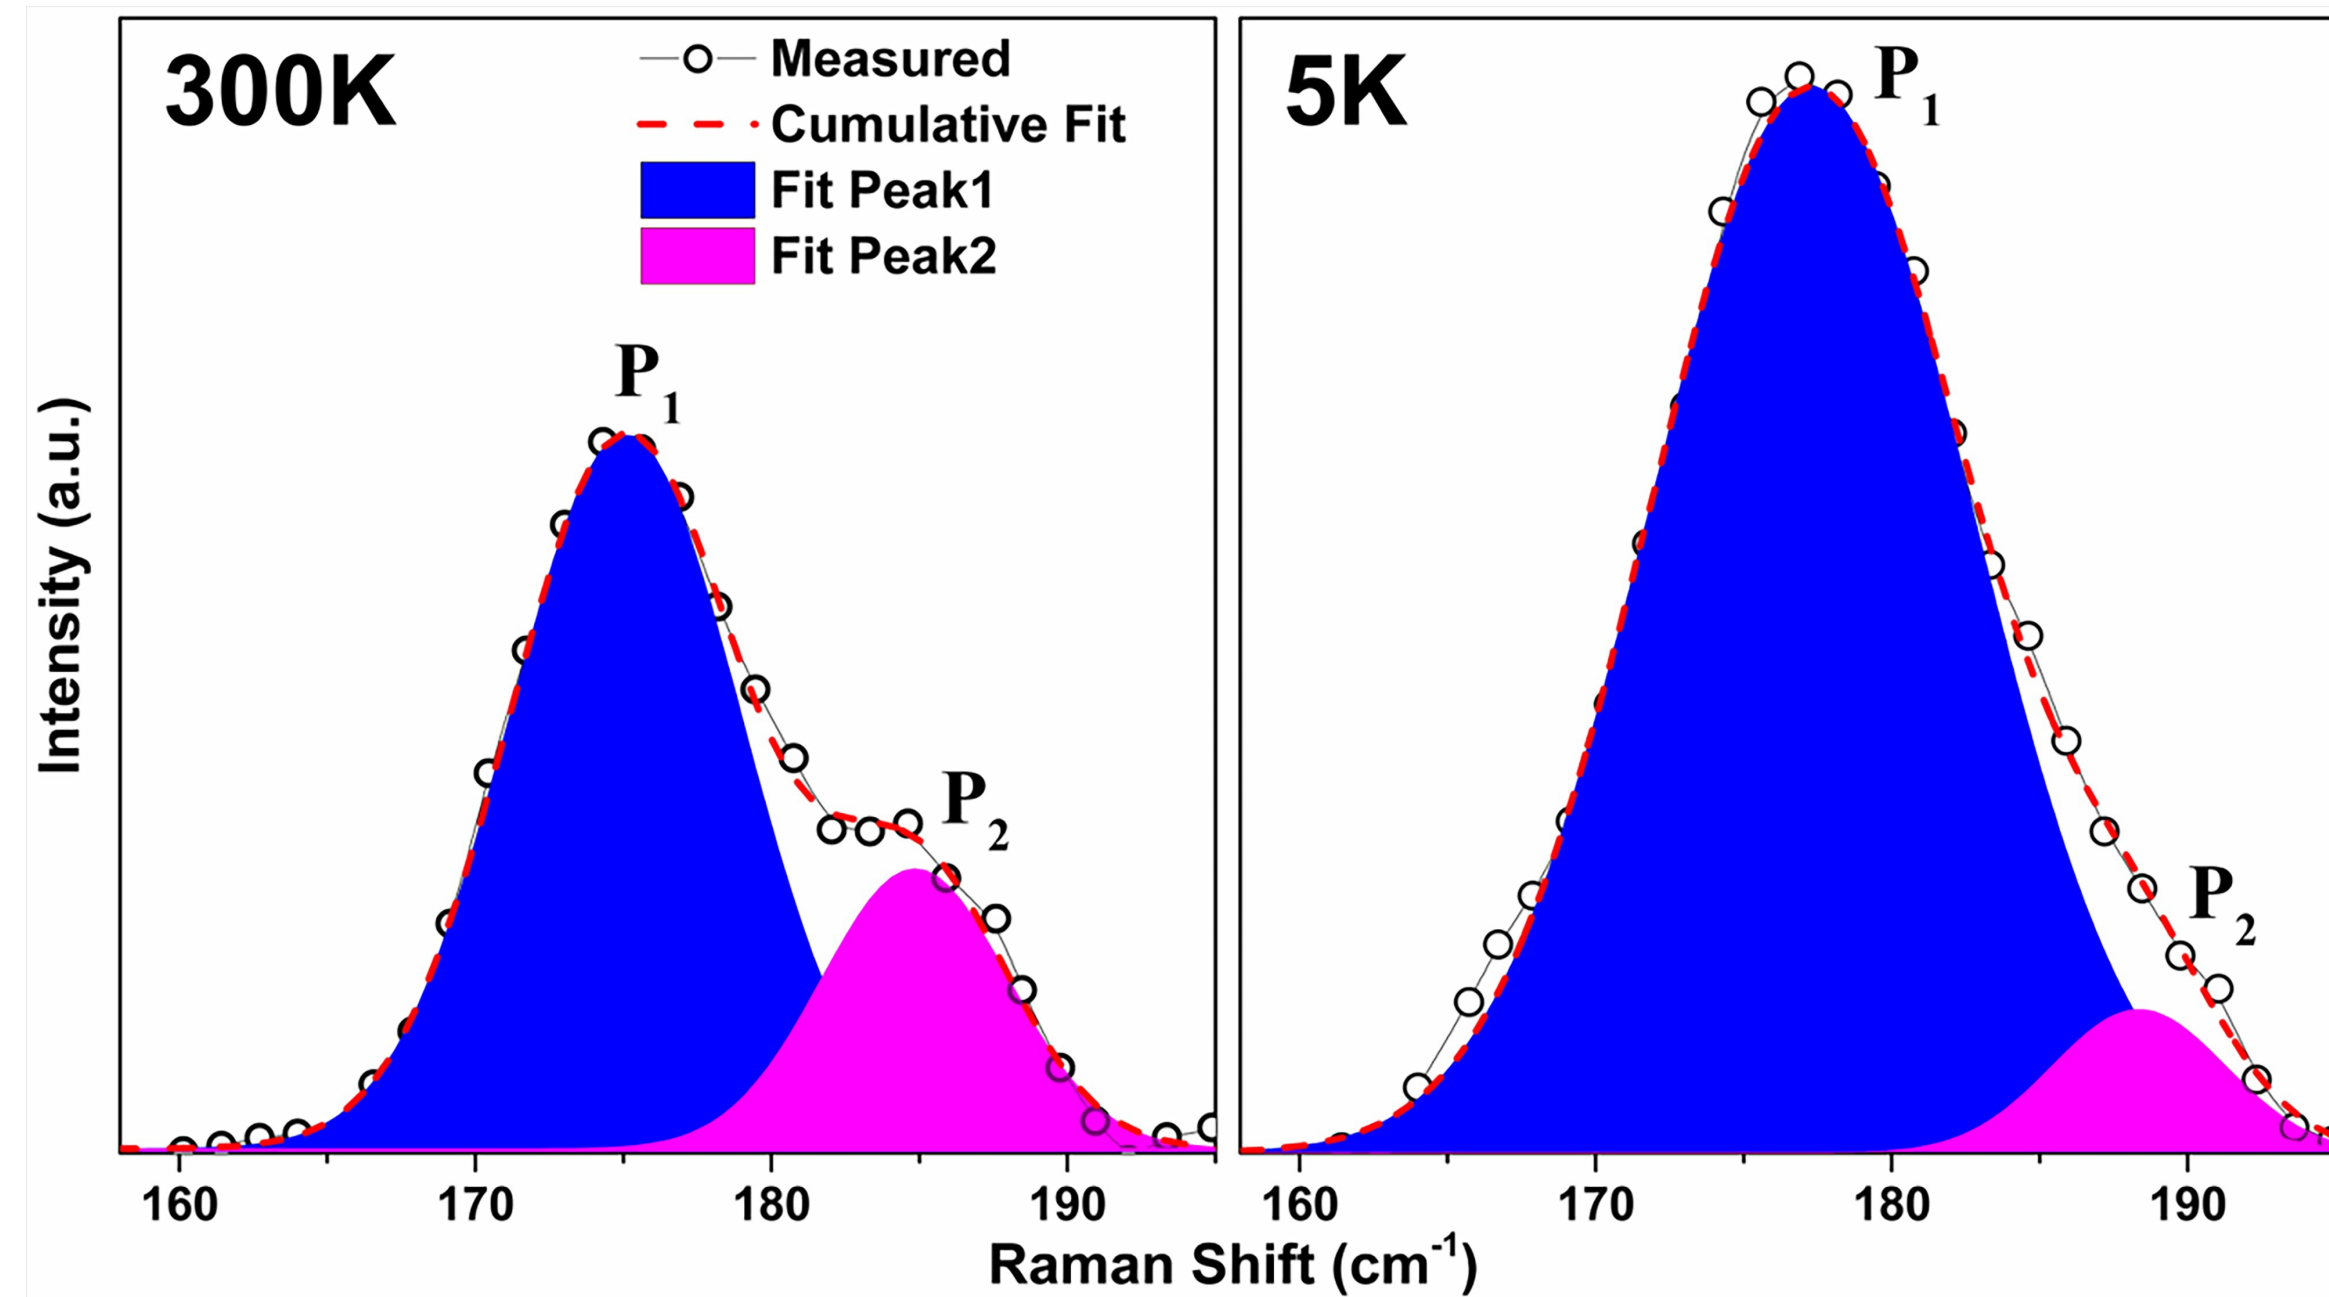

Supplement: d4nr01654h5.pdf [file d4nr01654h5.pdf]

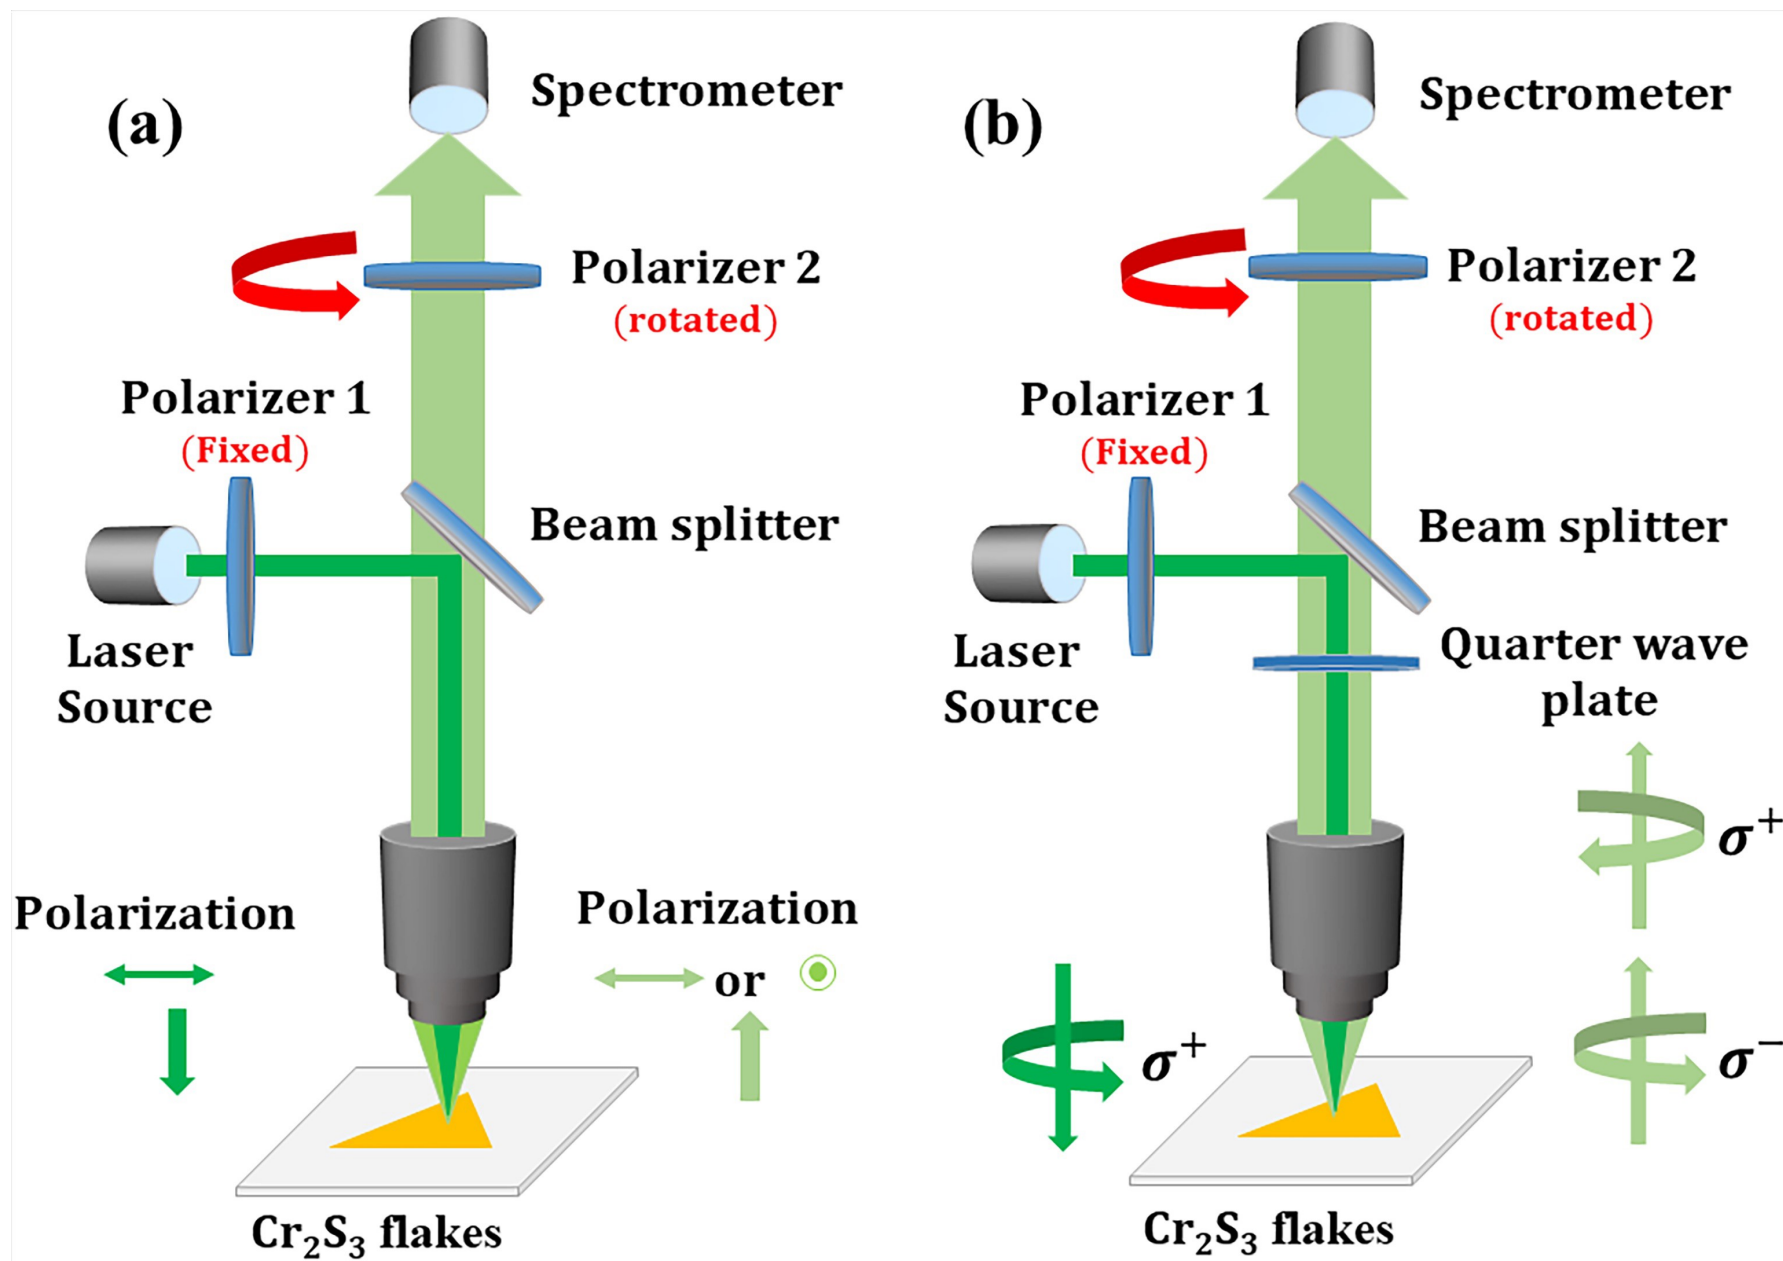

Supplement: d4nr01654h6.pdf [file d4nr01654h6.pdf]

(a)

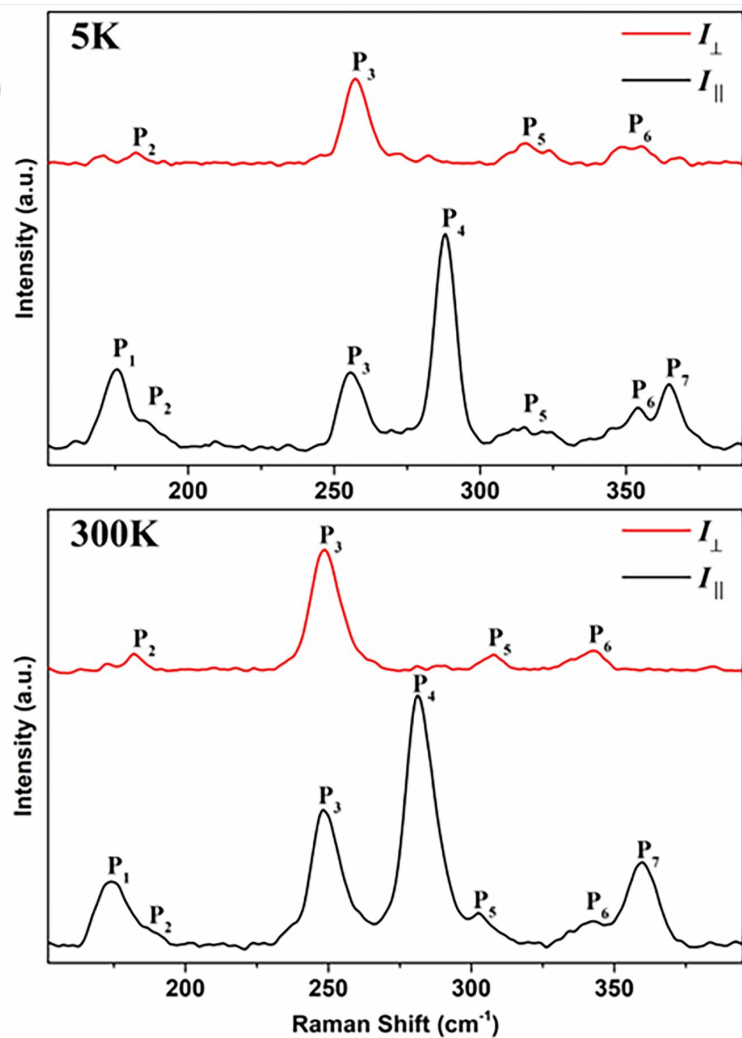

(b)

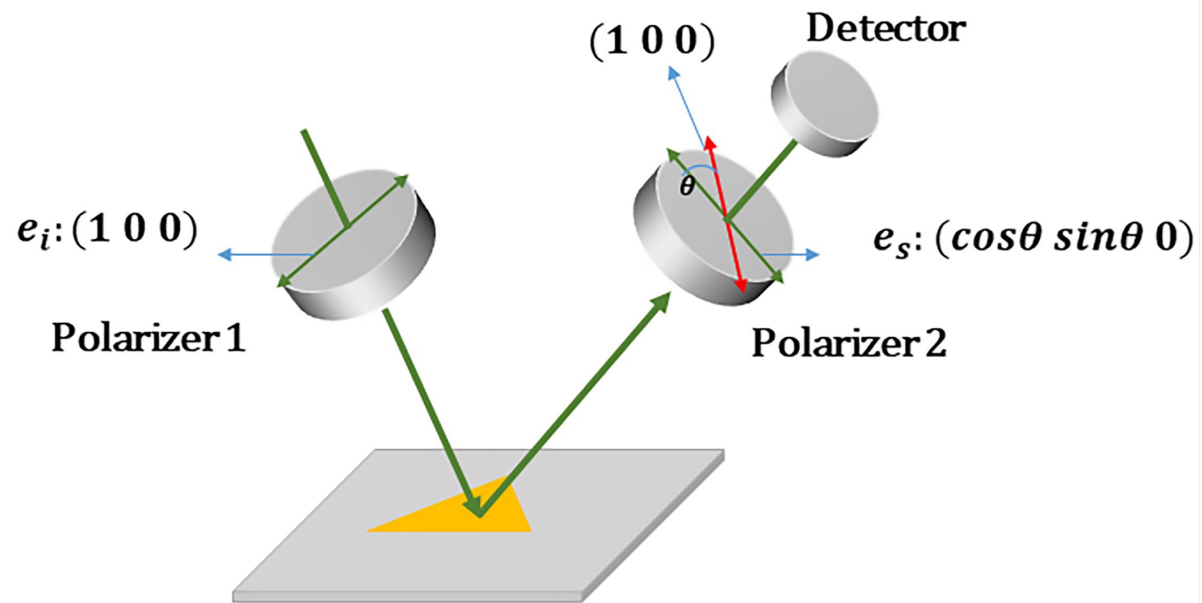

Supplement: d4nr01654h7.pdf [file d4nr01654h7.pdf]
